# Supplementary material for: Partial Versus Total Omentectomy in Patients with Gastric Cancer: A Systemic Review and Meta-Analysis
Source: MDPI journal article supplement (doi:10.3390/cancers13194971), 2021-10-03
Supplement: s1 [file s1]

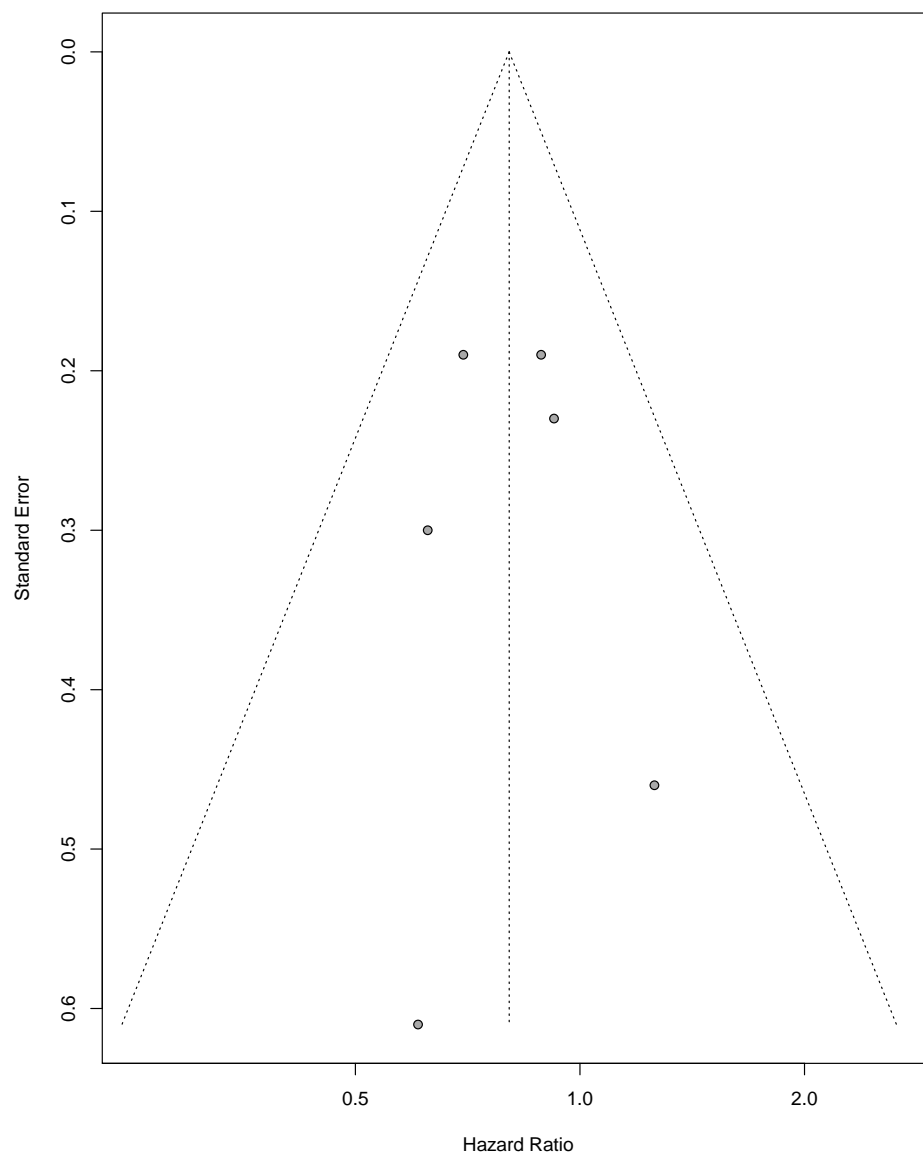

**Figure S1.** Funnel plot of OS between the partial omentectomy and the total omentectomy groups.

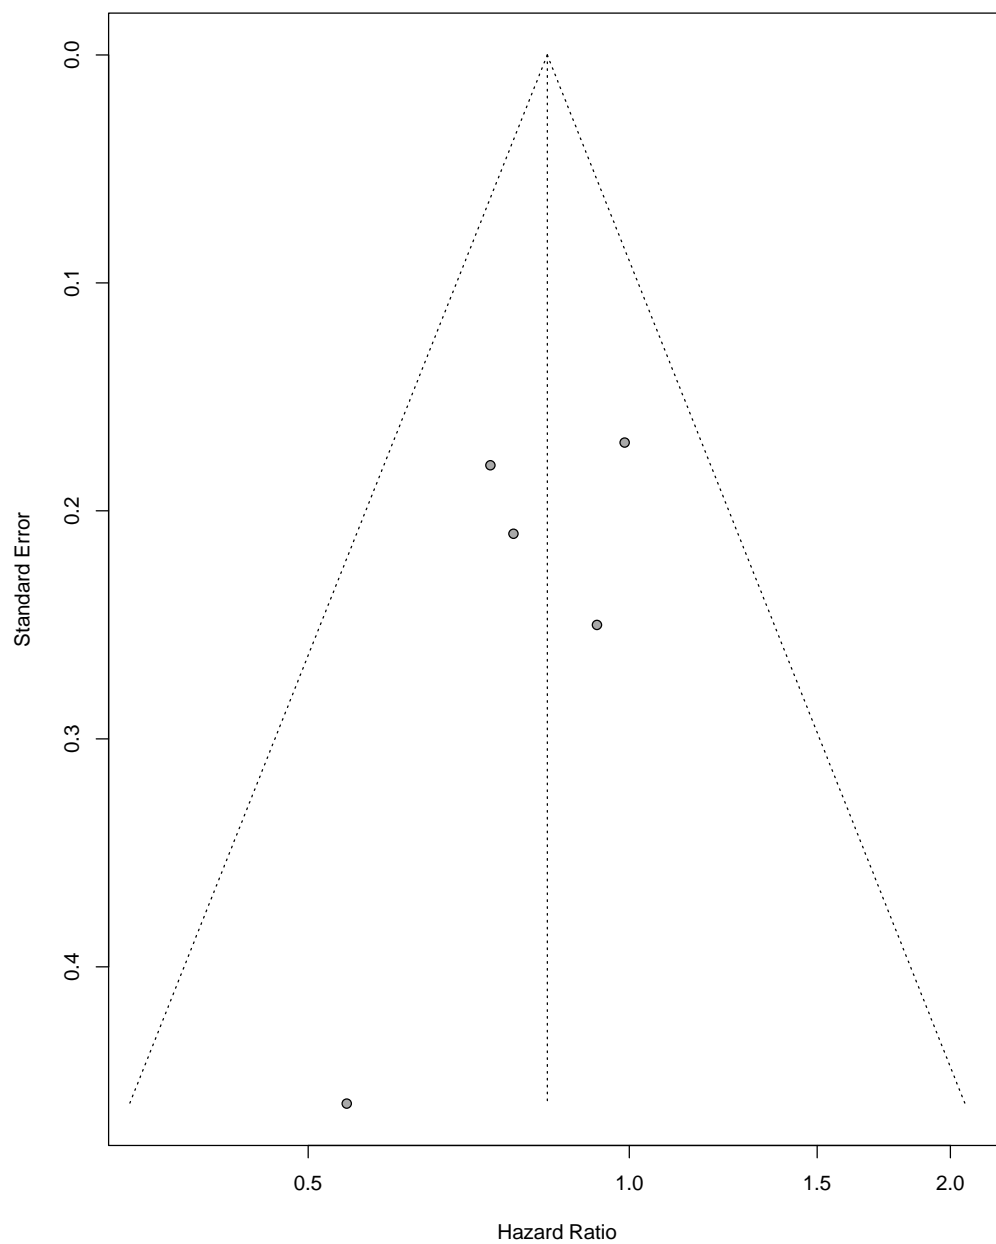

**Figure S2.** Funnel plot of DFS between the partial omentectomy and the total omentectomy groups.

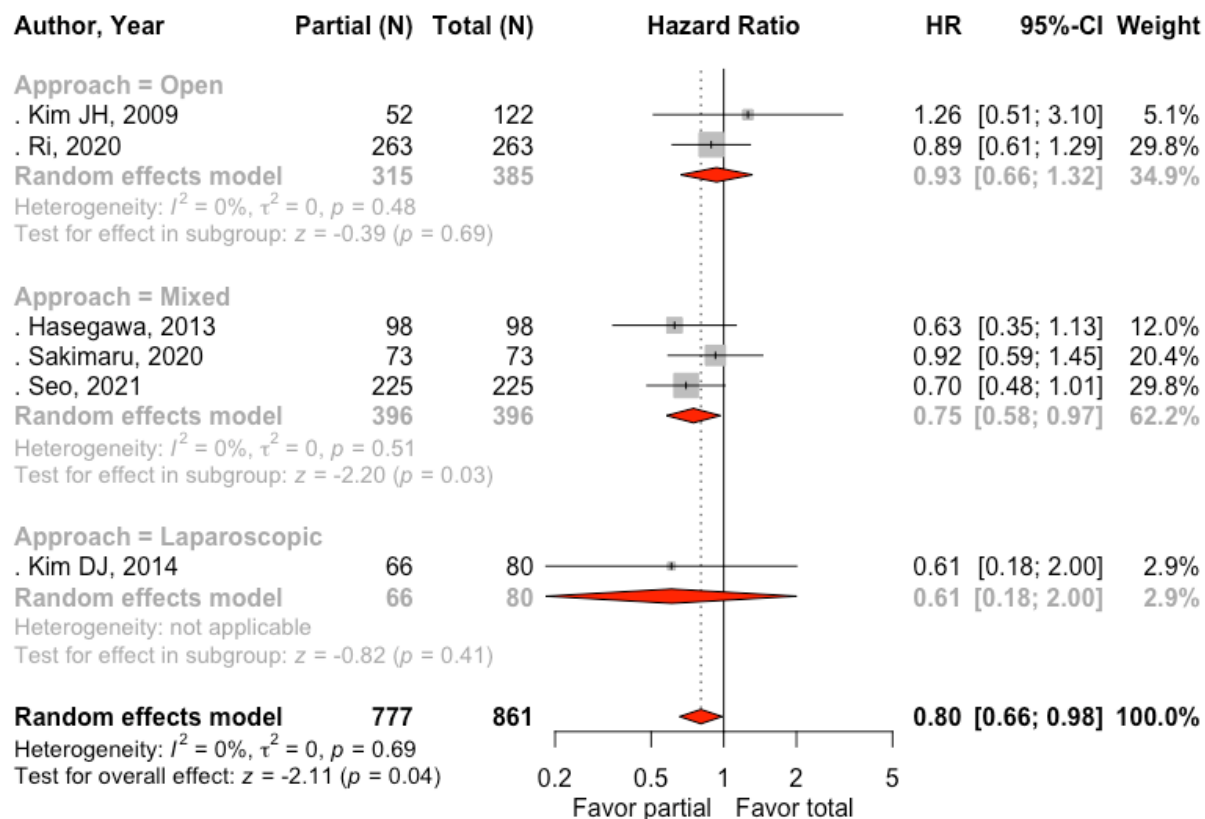

**Figure S3.** Forest plot comparing the overall survival between the partial omentectomy and the total omentectomy groups stratified by surgical approaches.

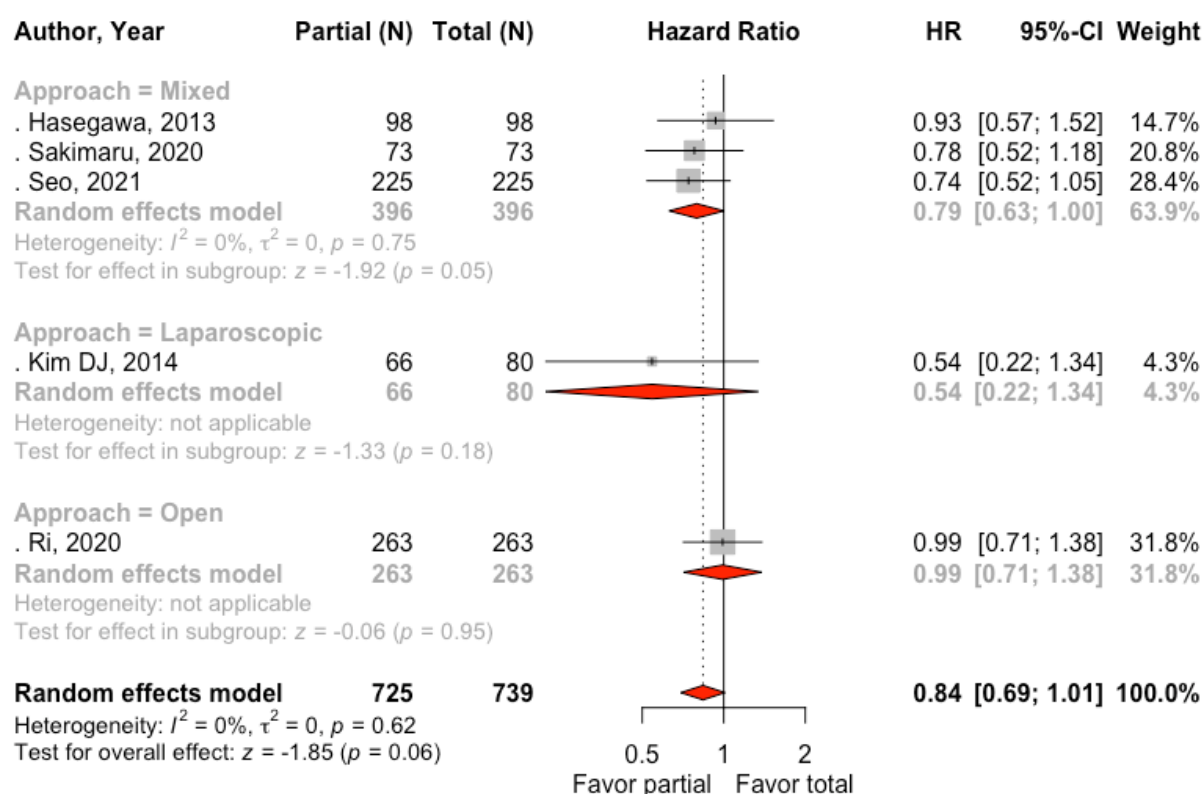

**Figure S4.** Forest plot comparing the disease-free survival between the partial omentectomy and the total omentectomy groups stratified by surgical approaches.
